# Supplementary material for: Sprouty1 is a weight-loss target gene in human adipose stem/progenitor cells that is mandatory for the initiation of adipogenesis
Source: PubMed Central journal article supplement (PMC6538615; doi:10.1038/s41419-019-1657-3), 2019-05-28

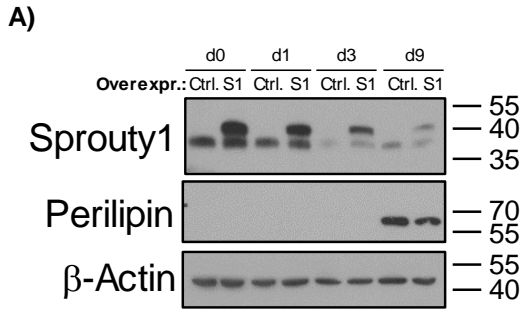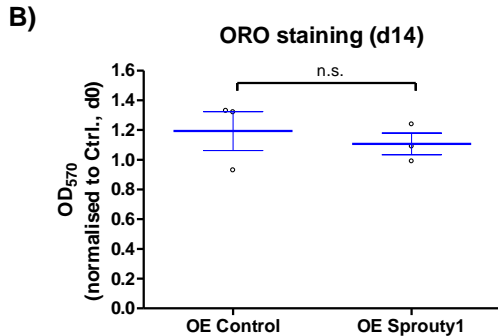

Supplement: 41419_2019_1657_MOESM1_ESM.pdf [file 41419_2019_1657_MOESM1_ESM.pdf]
